# Supplementary material
Source: Springer Nature journal article supplement (https://www.springermedizin.de/resource/supplementary/12882_2013_763_MOESM1_ESM.pdf/9454654)

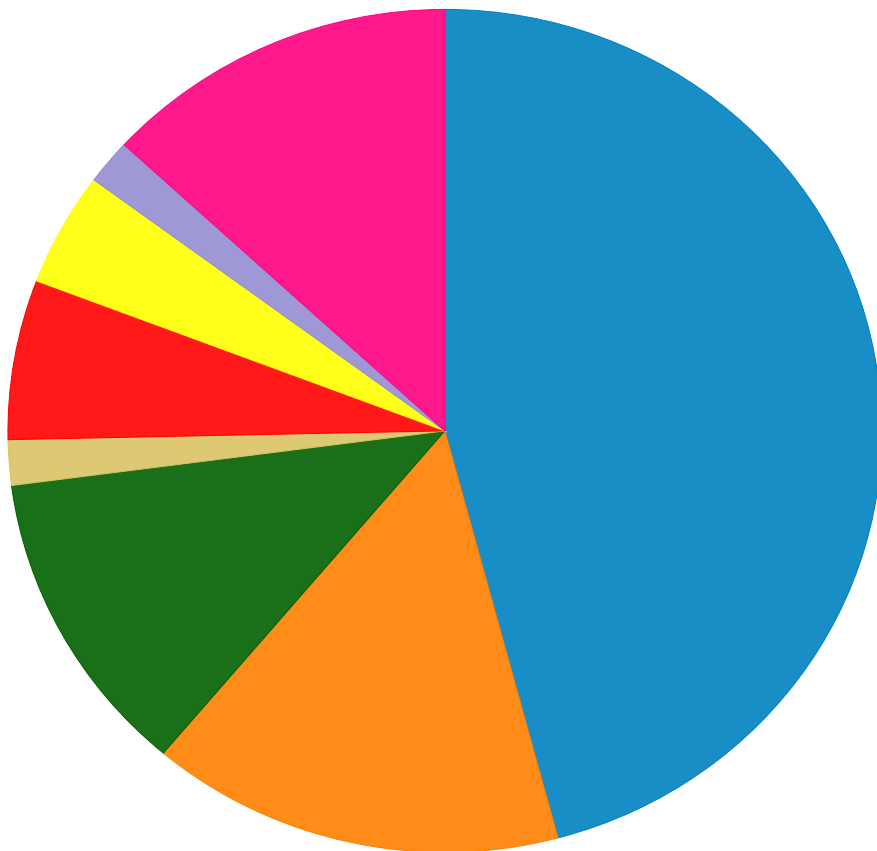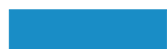

Lung (45.9%)

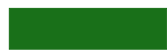

Vascular (11.8%)

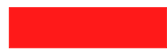

Abdomen (6.1%)

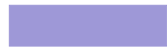

soft tissue (1.7%)

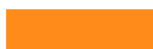

Gastrointestinal (15.3%)

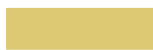

Bone (1.7%)

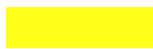

Breast (4.4%)

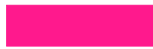

Others (13.1%)

Supplement: MOESM1 [file 9454654]
